# Supplementary material
Source: Research Square preprint supplement (doi:10.21203/rs.3.rs-9493109/v1)
Supplement: Supplementary file 1 [file e5f5efaa0724c440186d3d07.docx]

Supplements:

**Table S1:** Standards for Reporting Qualitative Research (SRQR checklist)

**Title and abstract Page/line no(s).**

| **Title** -   | Concise description of the nature and topic of the study Identifying the study as qualitative or indicating the approach (e.g., ethnography, grounded theory) or data collection methods (e.g., interview, focus group) is recommended | | --- | | Page 1 |
| --- | --- | --- |
| | **Abstract** - Summary of key elements of the study using the abstract format of the intended publication; typically includes background, purpose, methods, results, and conclusions | | --- | | Page 2 |

**Introduction**

| | **Problem formulation** - Description and significance of the problem / phenomenon studied; review of relevant theory and empirical work; problem statement | | --- | | Page 3 |
| --- | --- | --- |
| | **Purpose or research questio**n - Purpose of the study and specific objectives or questions | | --- | | Page 3 |

**Methods**

| | **Qualitative approach and research paradigm** - Qualitative approach (e.g., ethnography, grounded theory, case study, phenomenology, narrative research) and guiding theory if appropriate; identifying the research paradigm (e.g., postpositivist, constructivist/ interpretivist) is also recommended; rationale** | | --- | | Pages 4 - 7 |
| --- | --- | --- |
| | **Researcher characteristics and reflexivity** - Researchers’ characteristics that may influence the research, including personal attributes, qualifications/experience, relationship with participants, assumptions, and/or presuppositions; potential or actual interaction between researchers’ characteristics and the research questions, approach, methods, results, and/or transferability | | --- | | Pages 5 - 6  Pages 20 - 21 |
| | **Context** - Setting/site and salient contextual factors; rationale** | | --- | | Pages 3 - 5 |
| | **Sampling strategy** - How and why research participants, documents, or events were selected; criteria for deciding when no further sampling was necessary (e.g., sampling saturation); rationale** | | --- | | Page 5 |
| | **Ethical issues pertaining to human subjects** - Documentation of approval by an appropriate ethics review board and participant consent, or explanation for lack thereof; other confidentiality and data security issues | | --- | | Page 4; Page 20 |
| | **Data collection methods** - Types of data collected; details of data collection procedures including (as appropriate) start and stop dates of data collection and analysis, iterative process, triangulation of sources/methods, and modification of procedures in response to evolving study findings; rationale** | | --- | | Pages 5 - 6 |
| **Data collection instruments and technologies** - Description of instruments (e.g., interview guides, questionnaires) and devices (e.g., audio recorders) used for data collection; if/how the instrument(s) changed over the course of the study | Pages 5 - 6 |
| **Units of study** - Number and relevant characteristics of participants, documents, or events included in the study; level of participation (could be reported in results)  **Data processing** - Methods for processing data prior to and during analysis, including transcription, data entry, data management and security, verification of data integrity, data coding, and anonymization/de-identification of excerpts | Pages 5 - 7 |
| **Data analysis** - Process by which inferences, themes, etc., were identified and developed, including the researchers involved in data analysis; usually references a specific paradigm or approach; rationale** | Pages 6 - 7 |
| **Techniques to enhance trustworthiness** - Techniques to enhance trustworthiness and credibility of data analysis (e.g., member checking, audit trail, triangulation); rationale** | Pages 6 - 7 |

**Results/findings**

| **Synthesis and interpretation** - Main findings (e.g., interpretations, inferences, and themes); might include development of a theory or model, or integration with prior research or theory | Page 7 - 15 |
| --- | --- |
| **Links to empirical data** - Evidence (e.g., quotes, field notes, text excerpts, photographs) to substantiate analytic findings | Pages 8 - 15 |

**Discussion**

| **Integration with prior work, implications, transferability, and contribution(s) to the field -** short summary of main findings; explanation of how findings and conclusions connect to, support, elaborate on, or challenge conclusions of earlier scholarship; discussion of scope of application/generalizability; identification of unique contribution(s) to scholarship in a discipline or field | Pages 15 - 17 |
| --- | --- |
| **Limitations** - Trustworthiness and limitations of findings | Page 18 |

**Other**

| **Conflicts of interest** - Potential sources of influence or perceived influence on study conduct and conclusions; how these were managed | Page 20 |
| --- | --- |
| **Funding** - Sources of funding and other support; role of funders in data collection, interpretation, and reporting | Page 20 |

**Table S2**: Semi-Structured Interview Guide – final version - translated into English,

“Benefits and challenges of neurological telemedicine in primary care: a qualitative study”

| 1. What has been your overall experience of neurological teleconsultation as part of the NeTKoH project? |
| --- |
| - 1. What role did the teleconsultation play in your day-to-day practice? |
| - - 1. What influenced your decision to use neurological teleconsultation for patients? |
| - 1. How would you describe access to specialists, particularly neurologists, in your region? |
| - 1. How involved were you personally in the process? |
| 1. How would you describe the integration of teleconsultations in terms of the practice team and workflows? |
| - 1. What initial concerns or challenges did you face? |
| - 1. How was teleconsultation integrated into the workflow? |
| - - 1. Which times or days proved to be particularly suitable or unsuitable, and why? |
| - 1. What were the differences between the first and the last teleconsultation? |
| 1. How did you manage the technical and logistical integration of the teleconsultation device? |
| - 1. What was it like to operate the device? |
| - 1. How did you perceive the audiovisual quality of the teleconsultation? |
| - 1. What was your experience with technical support? |
| - - 1. Can you walk me through the usual procedure and how did it work for you? |
| - - 1. How often have you had to contact technical support? |
| - - 1. How long did it usually take? |
| - 1. How did you integrate the teleconsultation device spatially? |
| - - 1. What kind of room was used? |
| - - 1. How did usage of that room influence workflows? |
| 1. How would you characterize the advice given by the neurologists regarding the next steps in your treatment? |
| - 1. Which treatment steps were frequently recommended, and why? |
| - - 1. How feasible were these treatment steps? |
| - - 1. Which specialists were patients most frequently referred to, and what might have been the reason for this? |
| - 1. In your opinion, which neurological cases or conditions benefit most from teleconsultation? |
| - 1. How do you assess patient involvement in the telemedicine process? (e.g. patient acceptance, sharing of information) |
| 1. What are your thoughts on integrating neurological teleconsultations into standard care? |
| - 1. What were the main benefits of the project for you? |
| - 1. What were the biggest drawbacks for you? |
| - 1. What were the biggest challenges for you? |
| - 1. What suggestions do you have for improving the implementation of telemedical consultation? |
| - 1. What potential do you see for implementing the teleconsultation model in other specialist areas? |
| - 1. What would be required to integrate this form of care into your practice on a permanent basis? |
| Are there any other topics you’d like to bring up that we haven’t discussed yet? |
| Do you have any questions for me or our team? |

**Table S3:** Characteristics of the study participants

| Practice characteristics | | GP characteristics | | | | Medical Assistant characteristics | |
| --- | --- | --- | --- | --- | --- | --- | --- |
| Number of teleconsultations | Duration of the  intervention phase  (in weeks) | Assigned ID | Sex of the GP | Age group of the GP | Experiences with telemedicine prior to the NeTKoH study | Assigned ID | Sex of the MA |
| 106 | 105 | D11 | Female | 41 - 50 | Yes | - | - |
| 60 | 79 | D10 | Male | 51 - 60 | No | A10 | Female |
| 45 | 133 | D5 | Male | 41 - 50 | No | - | - |
| 41 | 79 | D13 | Male | 41 - 50 | No | A13 | Female |
| 26 | 92 | D8 | Male | 61 - 70 | No | - | - |
| 25 | 92 | D9 | Female | 51 - 60 | No | A9 | Female |
| 21 | 92 | D7 | Female | 41 - 50 | No | - | - |
| 15 | 133 | D1 | Male | 51 - 60 | Yes | A1 | Female |
| 9 | 26 | D12 | Female | 41 - 50 | No | - | - |
| 7 | 53 | D4 | Male | 51 - 60 | Yes | A4 | Female |
| 7 | 133 | D2 | Male | 61 - 70 | No | A2 | Female |
| 7 | 53 | D6 | Male | 51 - 60 | Yes | A6 | Female |
| 1 | 14 | D3 | Male | 51 - 60 | No | A3 | Female |
